# Supplementary material for: Oxygen diffusion mechanism in the mixed ion-electron conductor NdBaCo2O5+x
Source: Royal Society of Chemistry journal article supplement (doi:10.1039/c2jm34396g), 2012-01-01
Supplement: c2jm34396g.pdf [file c2jm34396g.pdf]

## Supporting information

Authors : Y. Hu, O. Hernandez, T. Broux, M. Bahout, J. Hermet, A. Ottochian, C. Ritter, G. Geneste, G. Dezanneau

Title : "Oxygen diffusion mechanism in the mixed ion-electron conductor NdBaCo<sub>2</sub>O<sub>5+x</sub>"

### Supporting information 1 : Rietveld plot of NdBaCo<sub>2</sub>O<sub>5+x</sub> at 1173 K

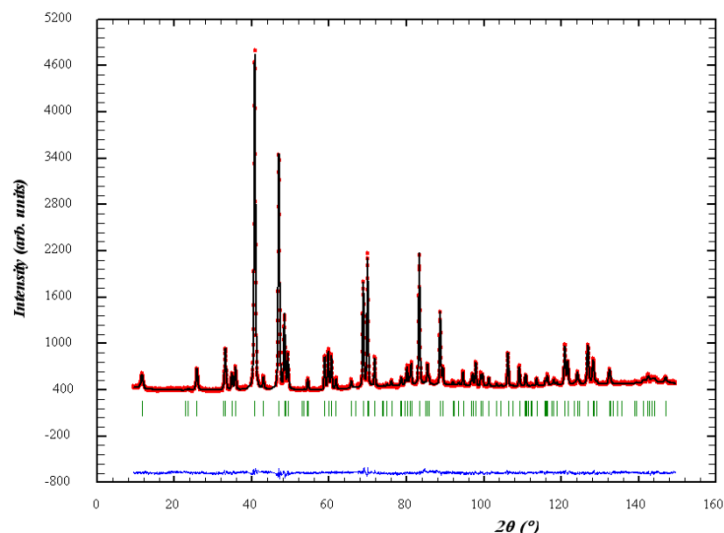

Results of Rietveld analysis against neutron powder diffraction data collected at 1173 K in air on NdBaCo<sub>2</sub>O<sub>5+x</sub> sample. The red circle symbols and the black line correspond to the observed and calculated intensities, respectively. Short vertical bars indicate the position of Bragg reflections within the *P4/mmm* space group (N°123). The difference between the observed and calculated profiles is plotted at the bottom. The wavelength of the incident neutrons beam is 1.594 Å.

### Supporting information 2: Structural data

The NdBaCo<sub>2</sub>O<sub>5+x</sub> structure has been refined within the *P4/mmm* space group (N°123). At 1173 K, the refined structural parameters (all atoms refined anisotropically) are:

| Atom | Wyckoff site | Occupancy factor | Fractional coordinates |       |            | $U_{eq}$ (Å <sup>2</sup> ) |
|------|--------------|------------------|------------------------|-------|------------|----------------------------|
|      |              |                  | $x/a$                  | $y/b$ | $z/c$      |                            |
| Nd   | 1 <i>d</i>   | 1.0000           | 1/2                    | 1/2   | 1/2        | 0.03452                    |
| Ba   | 1 <i>c</i>   | 1.0000           | 1/2                    | 1/2   | 0          | 0.03552                    |
| Co   | 2 <i>g</i>   | 1.0000           | 0                      | 0     | 0.2530(4)  | 0.03180                    |
| O1   | 1 <i>a</i>   | 1.0000           | 0                      | 0     | 0          | 0.03763                    |
| O2   | 1 <i>b</i>   | 0.405(7)         | 0                      | 0     | 1/2        | 0.05113                    |
| O3   | 4 <i>i</i>   | 0.960(6)         | 0                      | 1/2   | 0.29086(9) | 0.04736                    |

Refined formula: NdBaCo<sub>2</sub>O<sub>5.24(3)</sub> ( $x = 0.24(3)$ ) for  $Z = 1$

Unit cell parameters:  $a = 3.9741(14)$ ,  $c = 7.729(3)$  Å,  $V = 122.07(8)$  Å<sup>3</sup>

Agreement factors:  $R_{wp} = 2.04\%$ ,  $R_p = 1.65$ ,  $R_{exp} = 1.67$ ,  $\chi^2 = 1.23$ ,  $R_{Bragg} = 4.48\%$ ,  $R_F = 2.39\%$ ,  $R_{F2} = 2.62\%$  for 2734 observed points and 101 refined parameters

### Supporting information 3: Molecular dynamics calculation details

Simulations were performed following the order: NST → NVT → NVE, where NST means constant Number of particles, Strain and Temperature, NVT means constant Number of particles, Volume and Temperature, NVE means constant Number of particles, Volume and Energy.

For each run, the simulation parameters were:

| Simulation type | Total number of steps | Equilibration number of steps | Time step (ps) | Cut off Å | Extracted Information                                                     |
|-----------------|-----------------------|-------------------------------|----------------|-----------|---------------------------------------------------------------------------|
| NST             | 60 000                | 20 000                        | 0.001          | 10        | Supercell dimensions                                                      |
| NVT             | 60 000                | 20 000                        | 0.001          | 10        | Verification of supercell dimensions;<br>Configuration for NVE simulation |
| NVE             | 2 000 000             | 20 000                        | 0.001          | 10        | Atoms trajectory                                                          |

After NST simulations, the volume of the supercell was fixed according to simulations, forcing  $a_{supercell}$  and  $b_{supercell}$  dimensions to be equal. The consideration of supercell dimensions with  $a_{supercell} \neq b_{supercell}$  led to very similar results in terms of oxygen diffusion coefficients and oxygen density maps.
